# Supplementary material for: Considerations for hypothetical carbon dioxide removal via alkalinity addition in the Amazon River watershed
Source: Copernicus journal article supplement (doi:10.5194/bg-20-1963-2023), 2023-05-26
Supplement: Supplementary file 1 [file bg-20-1963-2023-supplement.pdf]

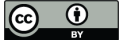

*Supplement of*

## **Considerations for hypothetical carbon dioxide removal via alkalinity addition in the Amazon River watershed**

**Linquan Mu et al.**

*Correspondence to:* Linquan Mu ([mulinquan@gmail.com](mailto:mulinquan@gmail.com))

The copyright of individual parts of the supplement might differ from the article licence.

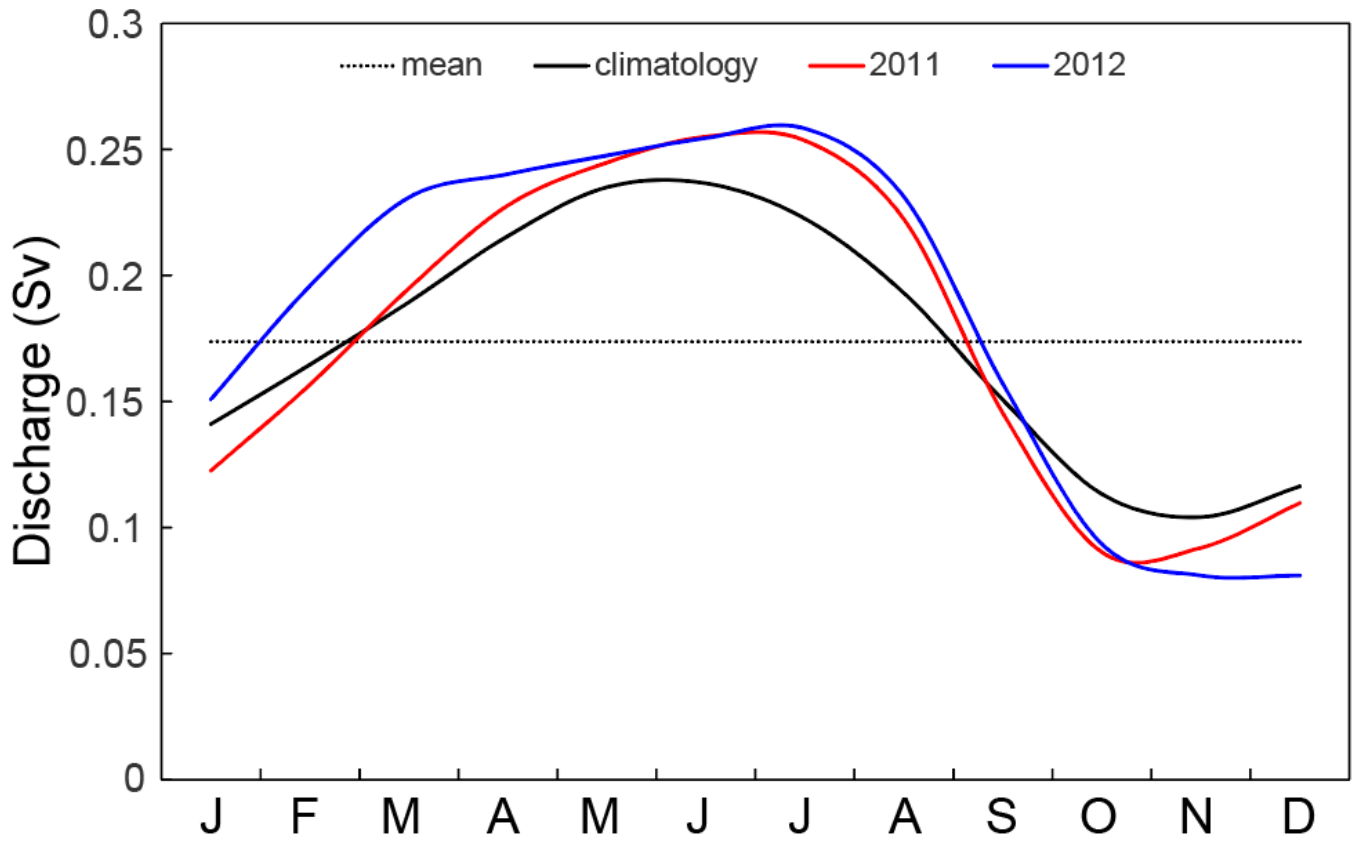

**Figure S1.** Monthly discharge of the Amazon River (Sv;  $1 \text{ Sv} = 10^6 \text{ m}^3 \text{ s}^{-1}$ ) at the Óbidos gauge station (~650 km upriver from the mouth) in 2011 (red line), 2012 (blue line), and climatology averaged over 1968–2012 (black line), in reference to the mean annual discharge 1968–2012 (dotted line).

5

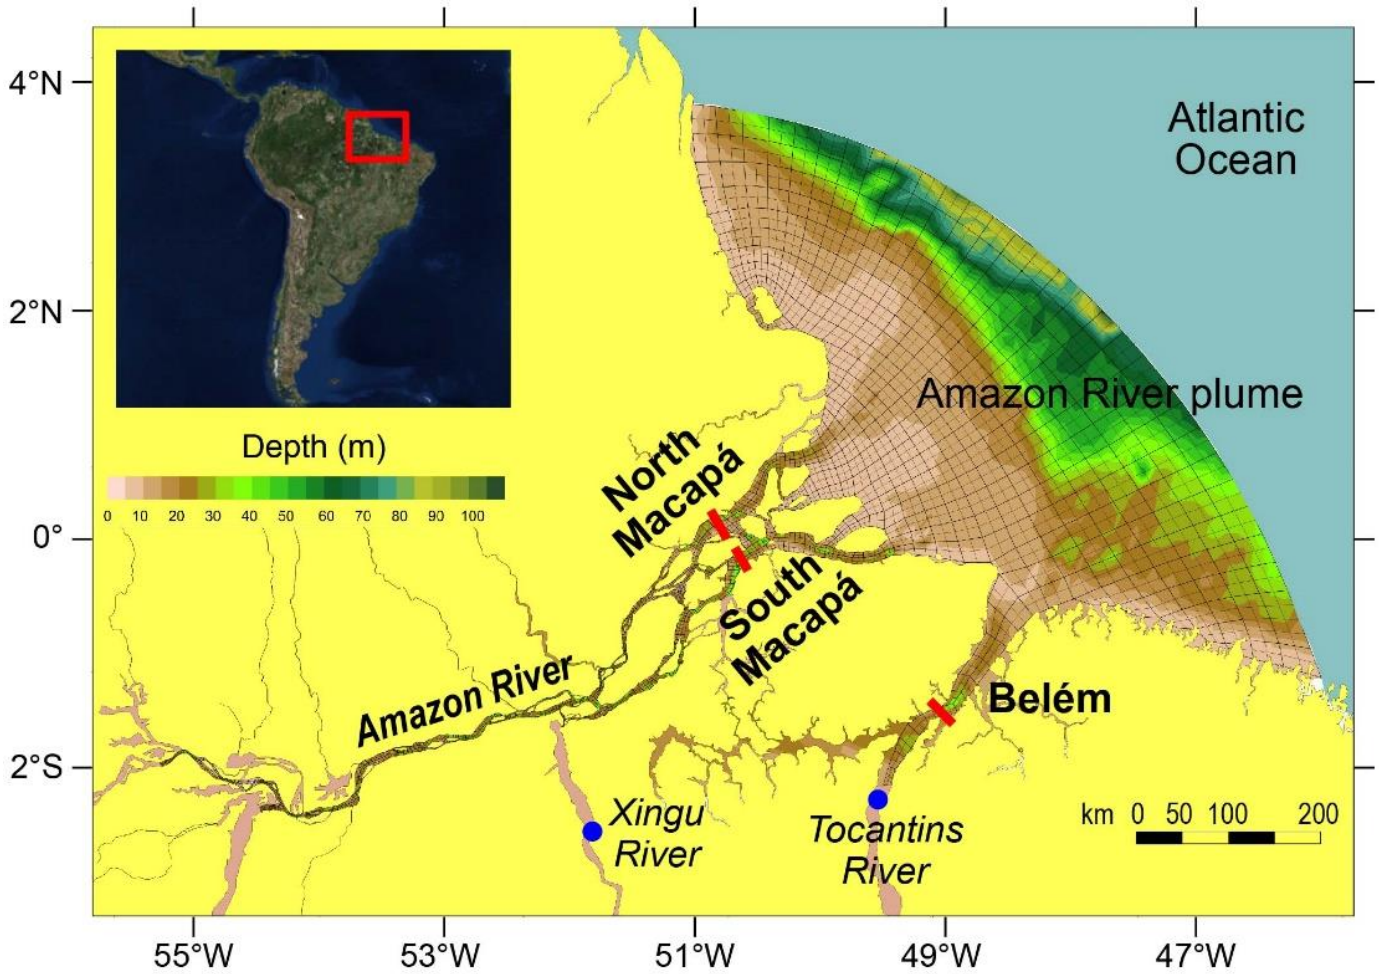

10

**Figure S2.** Map of the Amazon River lower reach. Geochemical surveys (in particular, river TA and DIC measurements) were conducted at the outer gateways (North Macapá, South Macapá, and Belém) during the September 2011 and July 2012 *River Ocean Continuum of the Amazon (ROCA)* project. This figure is reproduced from Ward et al. (2015) and Mu et al. (in revision).

15

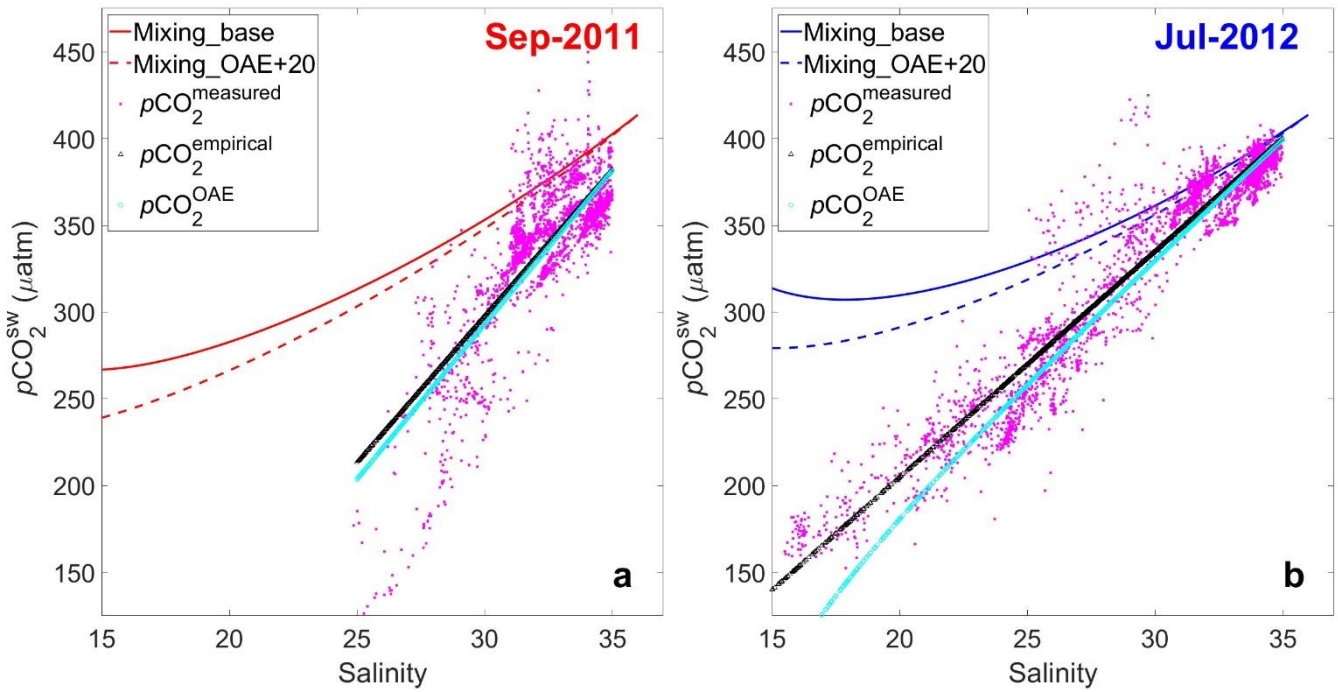

**Figure S3.** Surface  $p\text{CO}_2$  in the Amazon River plume at  $15 < \text{salinity} < 35$  and river-ocean mixing curve before and after the TA perturbation at the mouth for (a) September 2011 and (b) July 2012. TA perturbation strength is  $20 \mu\text{mol kg}^{-1}$ . The TA and DIC for the baseline mixing curves (solid red and blue lines) are calculated from the river and ocean endmember values, from which  $p\text{CO}_2^{\text{mix\_base}}$  at each salinity stamp is calculated using the CO2SYS program. The dashed lines show the OAE-perturbed mixing curve at  $\Delta\text{TA} = 20 \mu\text{mol kg}^{-1}$ . Black triangle markers show the empirical  $p\text{CO}_2$  ( $p\text{CO}_2^{\text{empirical}}$ ) at the plume surface computed from satellite-derived salinity and measured  $p\text{CO}_2$  ( $p\text{CO}_2^{\text{measured}}$ ; magenta dots) versus salinity regression, and open cyan circles represent the OAE-perturbed plume  $p\text{CO}_2$  ( $p\text{CO}_2^{\text{OAE}}$ ) at  $\Delta\text{TA} = 20 \mu\text{mol kg}^{-1}$ . Salinity as low as 15 was observed in the July 2012 survey, while no salinity under 25 was recorded during the September 2011 cruise.

20

25

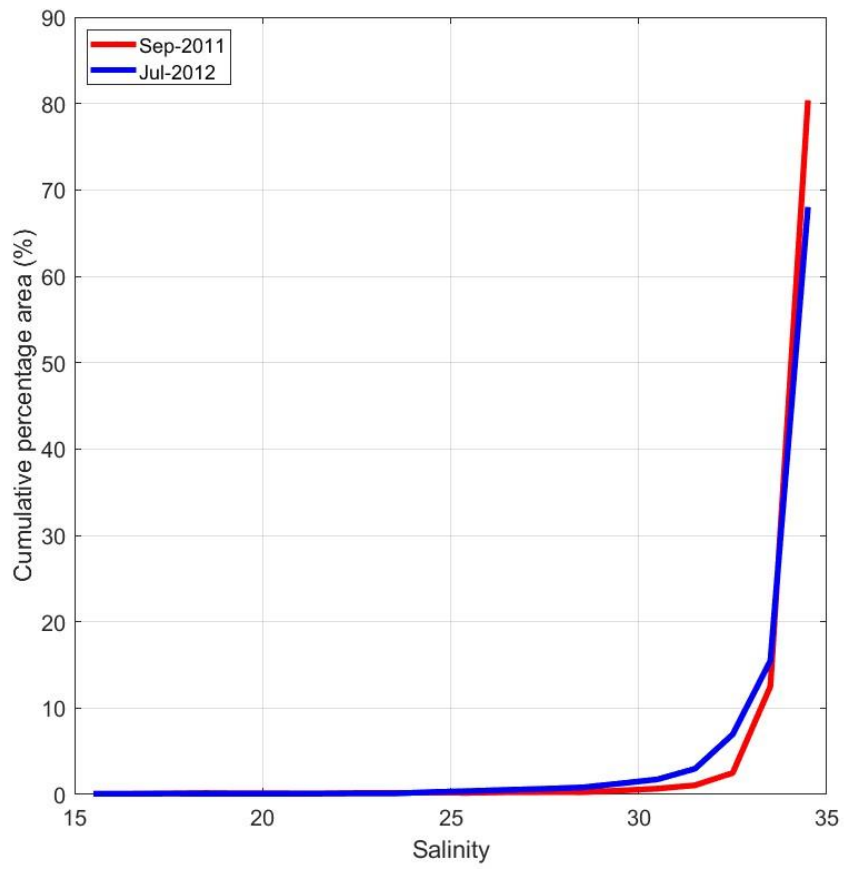

**Figure S4.** Cumulative percentage area (%) of the Amazon River plume across salinity bands within  $15 < SSS < 35$  for September 2011 (red) and July 2012 (blue). Note that the freshest part of the plume ( $SSS < 15$ ) is excluded from the total area to compute the percentages. This figure is reproduced from Mu et al. (2021).

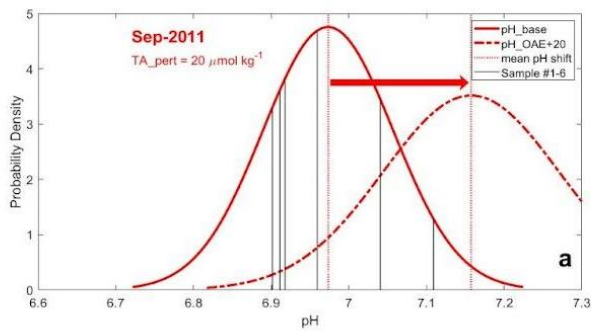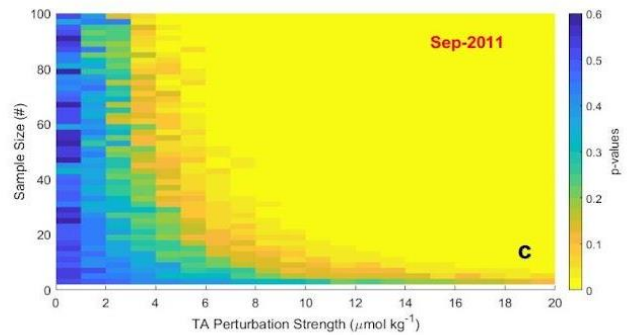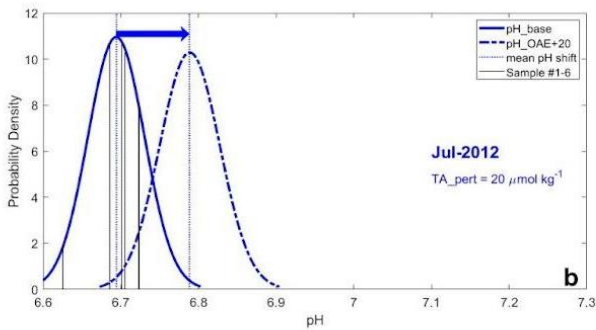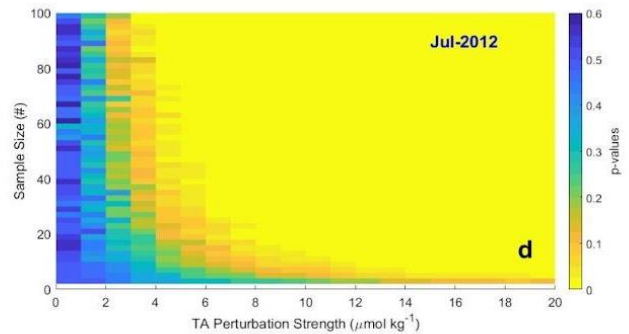

**Figure S5.** Detectability of OAE-induced pH variation in the North Macapá gateway relative to its background variability. (a)(b). The theoretical shift of pH ( $\mu\text{mol kg}^{-1}$ ) means and distributions for September 2011 and July 2012 due to the addition of  $20 \mu\text{mol kg}^{-1}$  of TA at the Amazon River mouth. Black lines indicate baseline pH calculated by baseline TA and DIC at the river mouth. The mean and standard deviations of pH in the perturbation scenarios (dash-dot lines) are calculated from perturbed TA and DIC values. (c)(d). The p-value plots from t-tests simulated between baseline and perturbed pH induced by TA perturbation scenarios at various sample sizes and TA perturbation strengths for September 2011 and July 2012. Areas in yellow ( $p < 0.1$ ) indicate conditions where an analyst would conclude that the TA perturbation was detected relative to the baseline condition with 90% certainty.

35

40

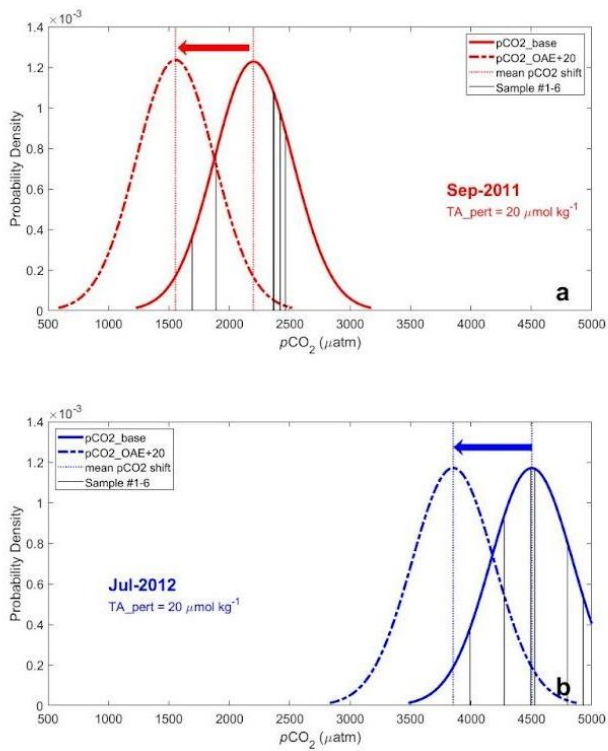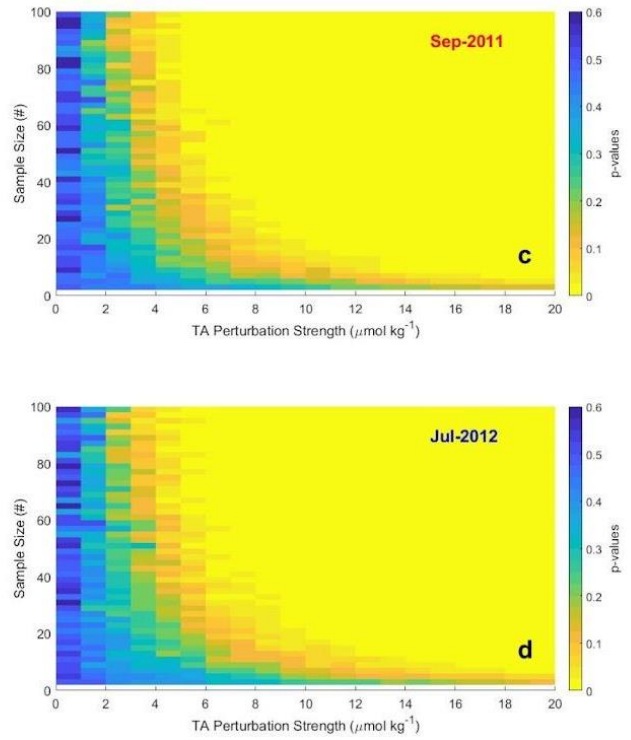

**Figure S6.** Detectability of OAE-induced  $p\text{CO}_2$  variation in the North Macapá gateway relative to its background variability. (a)(b). The theoretical shift of  $p\text{CO}_2$  ( $\mu\text{atm}$ ) means and distributions for September 2011 and July 2012 due to the addition of  $20 \mu\text{mol kg}^{-1}$  of TA at the Amazon River mouth. Black lines indicate the baseline  $p\text{CO}_2$  calculated by baseline TA and DIC at the river mouth. The mean and standard deviations of  $p\text{CO}_2$  in the perturbation scenarios (dash-dot lines) are calculated from perturbed TA and DIC values. (c)(d). The p-value plots from t-tests simulated between baseline and perturbed  $p\text{CO}_2$  induced by TA perturbation scenarios at various sample sizes and TA perturbation strengths for September 2011 and July 2012. Areas in yellow ( $p < 0.1$ ) indicate conditions where an analyst would conclude that the TA perturbation was detected relative to the baseline condition with 90% certainty.

45

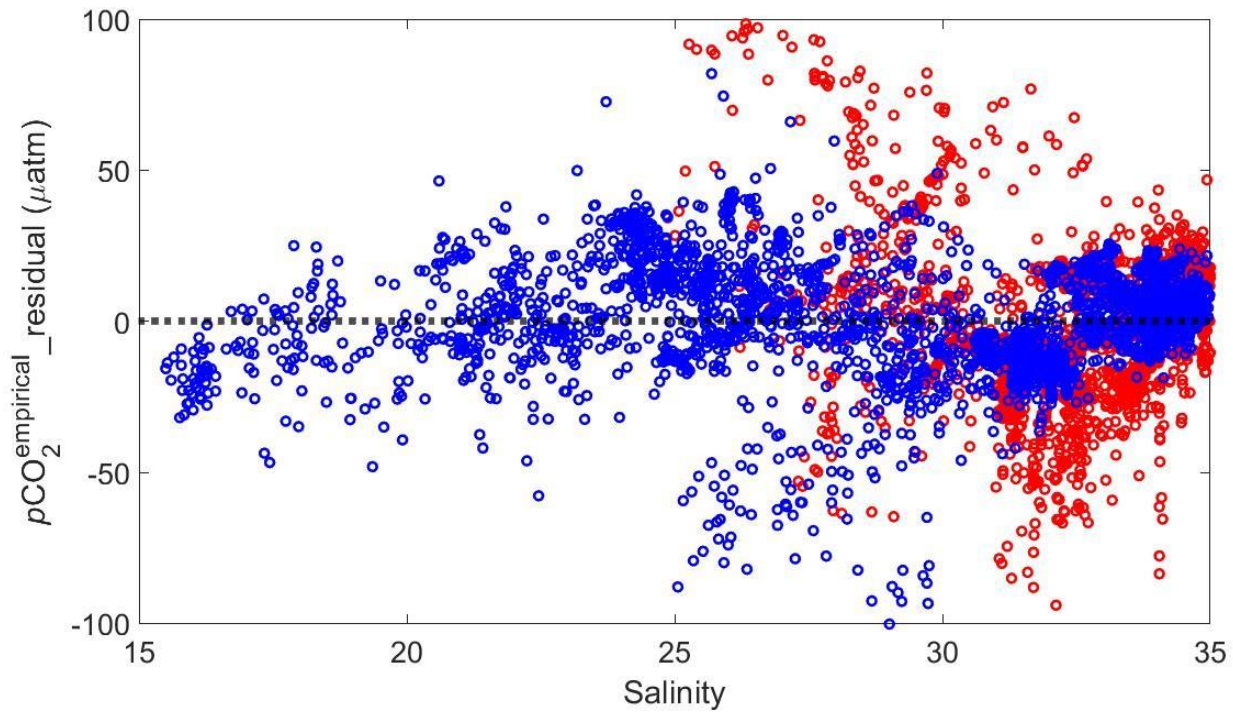

50

**Figure S7.** The residual of empirical  $p\text{CO}_2$  relative to the measured  $p\text{CO}_2$  at the same salinity across the salinity spectrum of  $15 < \text{SSS} < 35$  for September 2011 (red circle) and July 2012 (blue circle). Note that  $p\text{CO}_2^{\text{empirical\_residual}} = p\text{CO}_2^{\text{empirical}} - p\text{CO}_2^{\text{measured}}$  at  $15 < \text{SSS} < 35$ .  $p\text{CO}_2^{\text{empirical}}$  is calculated from cruise-specific  $p\text{CO}_2^{\text{measured}}$  versus SSS regression at a satellite-derived salinity (Mu et al., 2021).

55



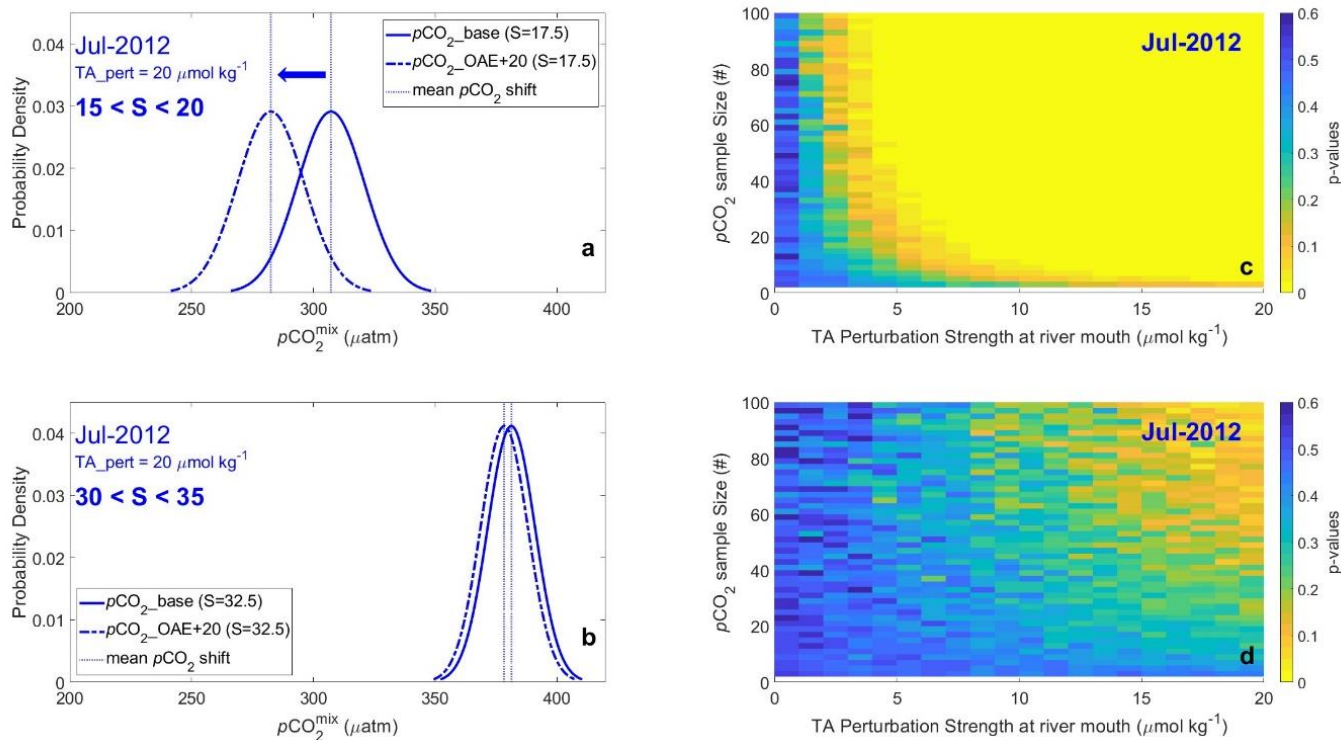

**Figure S8.** Detectability of OAE-induced  $p\text{CO}_2$  variation at different salinity ranges of the plume water. (a). The theoretical shift of plume  $p\text{CO}_2$  ( $\mu\text{atm}$ ) distributions at  $15 < SSS < 20$ , as a result of a TA perturbation of  $20 \mu\text{mol kg}^{-1}$  at the river mouth. Black lines indicate the baseline  $p\text{CO}_2$  calculated from the river and ocean carbonate endmembers at  $SSS = 17.5$  (following the mixing curve shown in Figure S3b). The standard deviation of the baseline  $p\text{CO}_2$  distribution is calculated from the root-mean-square error of  $p\text{CO}_2$  residual values for  $15 < SSS < 20$ , described in Figure S7. The mean of the  $p\text{CO}_2$  in the perturbation scenarios (dash-dot lines) are calculated from perturbed TA and DIC values that follow the dash-dot line in Figure S3b. (a). Similar to (a) but for the salinity range of  $30 < SSS < 35$ . (c)(d). The p-value plots from t-tests simulated between baseline and perturbed  $p\text{CO}_2$  in the plume, induced by TA perturbation scenarios at various sample sizes and perturbation strengths for  $15 < SSS < 20$  and  $30 < SSS < 35$ , respectively, in July 2012. Areas in yellow ( $p < 0.1$ ) indicate conditions where an analyst would conclude that the TA perturbation was detected through  $p\text{CO}_2$  relative to its baseline condition with 90% certainty.

## Reference in Supplemental Materials

- 70 Mu, L., Gomes, H. do R., Burns, S. M., Goes, J. I., Coles, V. J., Rezende, C. E., Thompson, F. L., Moura, R. L., Page, B., and Yager, P. L.: Temporal Variability of Air-Sea CO<sub>2</sub> flux in the Western Tropical North Atlantic Influenced by the Amazon River Plume, *Global Biogeochem. Cy.*, 35, e2020GB006798, <https://doi.org/10.1029/2020GB006798>, 2021.
- Mu, L., Richey, J. E., Ward, N. D., Krusche, A. V., Montebelo, A., Rezende, C. E., Medeiros, P. M., Page, B. P., and Yager, P. L.: Carbonate and nutrient contributions from the Amazon River to the western tropical North Atlantic Ocean, *Global Biogeochem. Cy.*, in revision, 2023.
- 75 Ward, N. D., Krusche, A. V., Sawakuchi, H. O., Brito, D. C., Cunha, A. C., Moura, J. M. S., da Silva, R., Yager, P. L., Keil, R. G., and Richey, J. E.: The compositional evolution of dissolved and particulate organic matter along the lower Amazon River—Óbidos to the ocean, *Mar. Chem.*, 177, 244–256, <https://doi.org/10.1016/j.marchem.2015.06.013>, 2015.
